# Supplementary material for: Comparative Genomic Analysis of Agarolytic Flavobacterium faecale WV33T
Source: MDPI journal article supplement (doi:10.3390/ijms231810884), 2022-09-17
Supplement: s1 [file s1]

**Table S1. Primers used in quantitative analysis of transcription levels of agarases**

| Gene      | Sequence (5'→3')          |
|-----------|---------------------------|
| gyrB      | F: GGAAACTTTATTGGAGAGGT   |
|           | R: GTGTTGATGTTATTACATAC   |
| agar.3    | F: GTATCCTAAAACTAATCACTAC |
|           | R: ATCTGGACTCAACATCCATG   |
| agar.2965 | F: AAAAATGGGGTTACTGAAAGAA |
|           | R: TTCTGGGCTAATGTAAAAACA  |
| agar.3018 | F: CCATCTGGTTTGGAAACCT    |
|           | R: AAATACATATCCTTGGTAAGTC |
| agar.3061 | F: TAGAAAATGCAGTTACTGTCTG |
|           | R: ACCGCCACCCATTCTGTT     |
| agar.3068 | F: TCGTTCAATTCGATGTTGATG  |
|           | R: TGGTAAAACTTCACAAAATCG  |

**Table S2. Summary of pan-genomes with different Roary identity cut-offs**

| <b>Genes</b>                     | <b>Identity cut-offs (%)</b> |           |           |           |           |            |
|----------------------------------|------------------------------|-----------|-----------|-----------|-----------|------------|
|                                  | <b>70</b>                    | <b>80</b> | <b>85</b> | <b>90</b> | <b>95</b> | <b>100</b> |
| Core (99% <= strains <= 100%)    | 8                            | 294       | 167       | 65        | 8         | 1          |
| Soft core (95% <= strains < 99%) | 1                            | 57        | 24        | 13        | 1         | 1          |
| Shell (15% <= strains < 95%)     | 964                          | 2706      | 2393      | 1815      | 960       | 215        |
| Cloud (0% <= strains < 15%)      | 84325                        | 54748     | 62993     | 72893     | 84349     | 3538       |
| Total (0% <= strains <= 100%)    | 85298                        | 57805     | 65577     | 74786     | 85318     | 3755       |

.

**Figure S1. Sequences of seven putative agarase genes present in the genome of *F. faecale* WV33<sup>T</sup>**

**1. Agarase. 3**

<Amino acid sequence>

MIYKFTIMKNKTLVALLATSFQLLSCSKDSPEQPPAVVAPSPTPTPTPTPEVTDYKLIAPADAGT  
GKKWEFQTDfSDDFDYTYPTSTTKTTFGNGKWTNWyHNAWNGPGLTKWtyENVtiENGILKLITT  
RVSGETKNyDYSGNTITGKATRLGAVVSNKQVVYPVYIESRIKIANSVNTSGAWMLSPDDTQEIDFM  
EAWGGKQARNNVSGGRQFSKTIHLSHHVFIRTPFQDYQPGDVSTWFTDSKVGDWSDAYHRYGVF  
WKSPTLEYyIDGVLVRSTNSLDNVGTKDGMdpKNFTSPTKEAATRTGLSKPMDILFTMEDQNWR  
AGIGCTPTDEEIKDtdGHTMKIDWIRIFKPVTK

<Nucleic acid sequence>

atgatttataaatttactatcatgaaaaacaaaactttttagtagcattattagcaacatcatttcagttgctgtcgtgttcaaaagattctccagagcaa  
cctcctgcagtagttgcaccaagtccgacacccaccccaacacctacacctacaccagaagtaacagattacaaactaatcgtgtacctgctgatgct  
ggaacaggaaaaaatgggaatttcaaactgacttttcagatgattttgactacacctatacgccatctacaacaaaaacaacttttggtaacggaaa  
atggaccaactgggtatcataatgcatggacggaccaggattaaccaaatggacatatgaaaatgttactattgagaatgggtatcctaaaactaatca  
ctacgcgtgtaagcgggtgaaacaaaaaattatgattacagcggtaacaccatcacaggcaaagcaacacgcctagggtgctgttctccaacaagc  
aagttgtctatccagtatatagagagtagaattaaaattgcaaacagtgtcaatacctctggagcatggatgttgagtcagatgacacacaagaa  
atcgatttcatggaagcttgggggtggtaaacaagctagaataacgtaagtggcgggaaggcaatttcgaaaacaattcacttaagccaccacgtat  
ttattcgtactccttttaagattaccaacctggcgatgtgtctacttgggttacagatagcaaagtaggtgattgggtcagacgcctaccatcgttatgga  
gtattctggaagagccctaccgaactagaatactatatcgatggcggttttggttcgttctacaaatagcttgacaatgttaggaaccaaatggaat  
ggacccaaaaaattcacttcgcctacaaaagaagcagcaactagaacaggcttaagcaaaccaatggacattttgtccatggaagatcaaaac  
tggagagccggaattggttgacacctactgatgaagaaattaaagataccgacggccatacaatgaaaattgactggattcgaatattcaaacgg  
gttaccaaataa

**2. Agarase.162**

<Amino acid sequence>

MGTWVLIPELSNEFNySSKTDPAFTTDWKDSyINSWTGPAPTKWVASGSSLGTAPTGEKCIILQATK  
VGNTLECGMVTSKAKATfPLYQEARVRISDSHLANAVWMLSTDSREEIDNLEsyGDKLGSKPYFGD  
KLHLSHHTfKDIAGIRKDYQPQLETWMIRKTGTGCNATDDVKWNTDFHIFGVKWVDATNLEYyV  
DGVKVRTVTGTDIDPNgyTDCSGMKKALHMIISQAAQTWRFADVNEFNyQNITNGARTKMYIDW  
IRVYRPNQNlGTSTCN

<Nucleic acid sequence>

atgggcacttgggttttaatacctgagctctcgaacgaatttaattattcaagcaaaactgatcctgcgtttacaacagactggaaagactcttacatta  
atagttggacaggaccagcaccaaaaaatgggtcgtagtaggttctcacttggacacgaccaactggagaaaaatgtataattcttcaagcaac  
aaagtggggaataccttagaatcggaatggttacatctaaagctaaagcaacattcccactttaccaagaggccagagtaagaataagtattct  
cacttagccaatgccgtgtggatgttaagtactgattctagagaagaaattgacaaccttgaatcttatggagataaattagggtaaaaccatatttg  
gagataaattacatttaagccatcatacttttaagatattgcaggatttagaaaagattatcaacccaattagagacctggatgataagaaaaacag  
ggacgggttgcaatgctactgatgatgtaaatggaataccgatttccatattttggggtaaaatgggttgatgctactaactagaatattatgtaga  
tggagtaaaagtaagaaccgtaacaggcacccgatattgaccgaacggctacacagattgttcaggaatgaaaaagcttgcataatgattattagt  
caagcagcacaacatggcgatttgcgtgacgtgaatgagttttacaaccagaacattaccaatggcgcaagaactaagatgtacatagactggattc  
gtgtttacagaccaaatacaaaatttaggcacctctactgttaataa

**3. Agarase.2965**

<Amino acid sequence>

MFQLTLKNQIMKLKQLKISLGLLTVFFTVSTIVAQPAAPSGKKWVKATYLSDDFNGSFDTSKWEQ  
SIWNYAGTPLMNNNNNSGVSGGNLWIKATDNGQNSNGAWFQSSRVQSKAKVGFPMYTECRIKAA  
NISAYSTYWLNNGDANNRDEIDICENNPKSITSQTYRPTYMYSQYFIVKNGVTERNAGNFDNRNL  
PAGNPAKGVKWNQYQVLGCVWKDSKHVQFYINGAPAGSLTTTGVTFLAQNIWDLWTGPFIDYLG  
GLAVRSDLANEAQSTMYVDWINTYTLANITGKEVESKLKSETYNYKTSVSPNPVSNLLQVTLKSEN  
DYNYSIIDPLGRSVAQGKIAVGSAEYNVNVSSLKSGIYFLILNGEDDSEKIKIMKN

<Nucleic acid sequence>

Atgtttcaattaaccttaaaaaacaaattatgaaattaaaaaaattacaaaaaatcagtttaggactgttgacagtattcttactgttagtactattgtt  
gcacaaccagccgccccttctggaaaaagtgggtaaaagctacatatcttcagatgatttaacggatcctttgatactcgaaatgggaacaatct  
atttggaaattacgcaggaacaccgactcttatgaataatacaattcgggtgtctcaggtgggaatttatggatcaaagcgacagataatggacaaa  
gtaactcaggagcgtgggttcagtctctcagtagacaatctaaagcaaaagtagggttcctatgtacactgaatgccgaattaaagcggctaataatttc  
tgcttattctacttattgggttaaataatggggatgcaaataaccgtgatgaaattgatatttgcgagaataatccaaaccttcaatcactagttagacat  
acagaccttacacaatgtattcacaaatattcatagttaaaaatgggggtactgaaagaaatgctggttaatttgacaatagaaacctccctgctggttaa  
tcttgcaaagggagtaaaatggaatacttatcaagttcttggctgctatttggaaagattctaaacatgtacaattttacattaatggagcgccagcggg  
tagtttgacaaccactgggtgttttacattagcccagaatattatttgggatttatggacaggtccatttgattatcttgggtggccttgagtaagaagcg  
atttggcaaatgaggctcaaagtacgatgtatgtagattggataatacatatacattggctaattacaggaagaagtcgagctaaagccttaa  
tcagaaacttataattacaaaactctgtgtcaccaaatccagtttcgaattattgcaggtaaccttaaaatcagaaaacgattataattcctatagatt  
atagatccttagtagtagatcagtagcgcaaggtaaaattgcagtcggatcagcagagtacaatgtaaatgtatcatctttaaactctggaatctattttt  
aattttaaattggagaggatgattcggaaaaaattaagattatgaagaattaa

#### 4. Agarase.3018

<Amino acid sequence>

MFITFSIVIAAACTKDEAPAPTPKATSISTKTPVGATLYSEIETGGTITLGNDNLITITERGICWGETTNP  
TTATNKKITTSNSNTFDLTLTGLKENQIYYLKA YFVAGSVTFYGDQKQLTTAKKPSEVSFLPSAGNN  
KSWVIQPVFSNEFNVDGKTADFTTNWQDRFFNGWTGALPTVYSASQSTITGGELVYKATIEKKSTG  
DIIRTGIVTSKTKVGYPMYMEARVKISESSLASA VWMLSEDSTQEIDNLEAYGDKTNDYYSKRLHLS  
HHVFIRTPFQDYQPSGLETTYADGKGQTQWANDYHNYGVLWLDPF TLKYYVDGVLVRTTPINQIDP  
NNYAGGTGLTKDMYLIISAASQPWRQSQGINYFTDPSVLDDARSTMRVDWIRVYKPE

<Nucleic acid sequence>

atgttcattactttttctattgtcatagcggctgcatgtacaaaagcgaagcaccagcgcgactcccaaagctacttccattagcaccaagactcctg  
tgggcgcaactttatattctgaaattgaaacaggaggaaccattactttaggaatgacaatttaacaattaccgaaagaggaatctgctggggaga  
aaccaccaaccaactacagcaaccaataaaaaataactactagtaattccaatacatttgatctcacttgacaggattaaaagaaaacaaatcta  
ttacctaaaagcctattttgtagctggttccgtaacttttatgggtgatcaaaaacaacttacaactgccccaaaacgaagcgaagtagttttctacaa  
gtgctggaacaataaaaagctgggttattcaacctgttttccaatgagtttaattatgatggaaaacagccgattttaccaccaattggcaagacc  
gtttctcaatggatggacaggagctcttccaactgtatattctgcttcaatcaaccattactgggtggcgaattagctcacaagctaccatagaaaa  
aaatcaactggagatataattcgaactggaatagttacgtctaaaactaaagtcgggttatccaatgtatatggaagcacgagtgaatttagcgaatc  
ttcattagcttcagctgtttggatgctcagcgaagactcaactcaggaattgacaatctagaagcttatggcgataaaacgaatgattactactcaa  
acgtttacacttaagtcacatcatgtcttcataagaacaccatttcaggattaccagccatctgggttgaaacctattatgctgatggcaagggaacacaa  
tgggcaaacgattaccataattatggagtattatgggttagatcctttacattaaaaatattatgtagatgggtgtactagtaagaacaacgccaatcaacc  
aaattgaccttaataattatgtcgttggaactggacttaccagagatgtatttaattttcggccgcatcccaaccttgagacaatcacaaggca  
taaattactttactgatccatccgtgttggatgatgctcatcaaccatgcgcgtagactggattagagtttataaacagaatag

## 5. Agarase.3061

<Amino acid sequence>

MKKNILFIAGTFLTFSSLLSAQIKAPEGKSWQLVSELSDEFNGKKLDTKKWIADPEGHPEFGWIGRSP  
ALFIENAVTVENGYNIEVGKLDERFVSNKYNTATNYDYYGGIIRAVKPVITYGYFESTFKMSKTEM  
GGGFWMISKNTCGKKHEIDITESVGSISPLAQEWGKKWDKIMHSNTILRNNTTCNEEKRDQGMILPE  
TKNSEKFYTYGCWWKSPNELLFYLDGKYVYTLTPPADFDQQMFIHFSIEVYDWNPIPEKDSKLMTA  
SKKDRTALIDYIRTYKLVTVKP

<Nucleic acid sequence>

atgaaaaaacattcttttatagctggaactttttaacatttagttctctattaagtgcgcaaattaaagcgctgaaggtaaatcatggcaattgggt  
tctgaattatcagatgagtttaacggaaaaaattagataccaaaaaattggaatgcagatccagaaggatcatctgaattcgggtggattggctgtct  
cctgcccttttatagaaaatgcagttactgtcgaaaacggatatttaaatattgaagttggaaaactagacgagcgttttgaagcaacaaataata  
cggctaccaattatgattattacggaggtatcattagagcagtgaaacctgtaacttatggttatttttgagagtactttcaaaatgagcaaacaga  
aatgggtggcgggttttggataatgtctaaaaatacctgtggcaaaaacacgaaattgacattaccgaatctgtcgaagtatttctccactagcaca  
agaatggggcaaaaaatgggataaaattatgcattccaataccattttacgaaatactacttgcaacgaagagaaaagggatcaggggaatgatcctt  
ccgaaacaaaaaattctgaaaaattctatacctacgggtgttggtggaagagcccaaatgaattatttctatttggatggaaaaatgtgtatacac  
taacacctctgcggactttgaccaacaaatgtttattcattttcaattgaagtctacgattggaatccaattcctgagaaagacagtaaaactgatgaca  
gcatcaaaaaagacagaactgccttgattgactacataagaacctataaattggttacggtaaaaccttaa

## 6. Agarase.3068

<Amino acid sequence>

MKKQYLILLVPAAFFAQVKVAVNLNVKHTVGGVSTFERSKFITMHSNTTDEWDGDNQIGDLRN  
NFLNGLDVYLGRETGLITYTLNQVAQDPARAGYASPTDIASRGLSSRNSFAAKTNLAQYESRKGM  
IFGGQLYPFWTGVGQKPTAKGWNANGTATGEYMGRFMKEFFGGNGPSLPAPLEIVNEPDYELLG  
GVKEYTKTIAEIANFHIAAADAIRAQMPNTKICGYTNSFPYYEVGEFQRWFNRDKMFMDMAGSKM  
DYYSIHL YDFPTIGGKRQMRSGSNLEATFDMMDHYGMLSVGSKPYVLSEYGAQTHDSNNQQWSS  
YRDWLVNKSFN SMLMSFLERPNTIASAIPFVIVKA EWGYNSTTGVPYTSRLMRKANEPASYTGQWV  
YTD FVKFYQQWKNVKGRTRVDIKSDDPDILVKAYVDGNKGVIINNLEQAVKTIDLNLFDHDANNL  
TQIVKRYLTLTANQTDLQETTTTSPITSLTIGSESHVVLEYTFANPIAIDRTLDETKYYADDYLPKPIVAA  
NTPVVYNVNGITKATYGEAILRIGVGRATGKSLVPVIKVNNTLVTTPTDFRGDNQPPQRDSFFGVLEI  
PVPYNLLDVNNVISVQFPDAGGNVSSVCMQVNNF SHNIRVLA TNTFKYDSQISLAPNPASDMVTL  
KIVEELIGSSASIYNMQSALVQTEKLSQLDNNFTIAKLPGVYFVVLKKNNTTMAKVKLIVN

<Nucleic acid sequence>

atgaaaaacaatacctaactcttttagtgccggctgctttttgcccagtaaaagtagctgtgaactgaaatgtcaaacatactgttggtggcgt  
ttcgaactttgaacgctctaagtttattacgatgcactctaatacaacggatacggaaatgggatggagacaatcaaataggatgatctacgaaataattc  
ctaaacggactggatgtttatttgggtcgtgagacgggattgattacgtatactttgaatcaggtggcacaggatcctgcacgtgctggttatgcaagt  
cctactgatattgctcaagaggattgtcatctcgaaatagtttgcgtgctaaaaccaatttagcgcaatacagagccgcaaggagggaatgatttt  
gggggtcaattgtatccattttgacgggtgttgggcaaaaaccaacagctaaggatggaatatagccaacggaaactgctacaggagaatacat  
gggacgttttatgaaagaatttttggagggaacggacgtattacgtgctttttggaaattgtcaacgagcctgattatgaactattgggtggtgtg  
aaagaatataccaaaacgattgcggagatagccaattttcacattgcagcagccgatgaattagagcgcaaatgcaaatactaagatttgggt  
ataccaattcgttccgtattacgaagtaggggagttcaacgttggttaaccgagacaaaatgttatggatatggcaggaagcaaaatggattatt  
attcgattcatttatatgattttcaactattggcggaaagcgtcagatgcgttctgggagtaactctgaagccacatttgacatgatggatcattatggt  
atgctttcggtagggtcggttaaagccttatgtgctttcggaaatattggagcacaacacatgattcaacaaccaacaatggagttcgtacagagattg  
gctaaatgtgaaatcgttcaattcgatgttgatgtcgttttagaaagaccaacaacattgctagtgcgattccgtttgcatcgtaaaagcagaatgg

ggttacaacagcacaacgggagttccttatactagccgattaatgcgcaaggccaatgagccagcgagttatacaggacaatgggtttataccgatt  
ttgtgaagttttaccaacaatggaaaaatgtaaaaggaactcgagtagacatcaaatcagacgatcccgatatttttagttaaagcttacgttgatggca  
acaaggatattgtattataaacaatctagagcaagcagttaaaacaattgatttaaatattttgatcatgatgctaataacttaacgcaaatgtaaa  
acgttatttgaccttgacggccaaccaaacagatttacaagaaacaacaacttctccgattacgtccttgactatcgggttcagagtcacatgttggtt  
tagaatatacttttgccaatcctattgcgattgatagaaccttggacgaaacaaaatactatgccgacgactacttaaaaccaattgttcagcaataac  
gccagtgggtttataatgtaaacggaataacgaaagcaacttatggcgaggctattttgcgtattgggggtgggttagagcaaccggaaaatcactgggtt  
cctgtaatacaaagtgaataatacccttgcacaactccaaccgatttttagaggggataatcaacctcaaagagattcttttttgaggttttagagattcct  
gtgccctacaatcttttgatgtgaacaatgtaatttcagttcagttccagacgcggcggaacgtgagtagtgatgtatgcaagtaataatttta  
gtcataatattcgagtattagcaaccaacacattaaatatgattcgcaaattagtttagcaccaaatctgctagcgatatggtaacgttaaaaaattgta  
gaagaattgattggcagttctgcaagtatttacaatatgcaatcggttttagttcaaacagaaaaactaagtcagttagataataatttcacaattgcta  
agttgccaaaggaggtttattttgtagtactaaagaaaaataatacacgatggccaaagtgaagttgatcgtaaattag

## 7. Agarase.3154

<Amino acid sequence>

MKATLLSFIALSSLILSCTNKEESTLLESASIFDDNLISQNLTNKSILSTNCPKPADANLFIAITNNNSN  
VLNRSQNGMGTWVLIPELSNEFNYSKTDPAFTTDWKDSYINSWTGPAPTKWVASGSSLGTAPTGE  
KCIILQATKVGNTLECGMVTSKAKATFPLYQEARVRISDSHLANAVWMLSTDSREEIDNLESYGDK  
LGSKPYFGDKLHLSHHTFKDIAGVRKDYQPQLETWMIRKTGAGCNATDDVKWNTAFHIFGVKWV  
NATNLEYVVDGVKVRTVTGTDIDPNGYTDCSGMKKALHMIISQAAQTWRFADMNEFFNQNITNG  
ARTKMYIDWIRVYRPNQNLGTSTCN

<Nucleic acid sequence>

atgaaggcaacattattatctttatcgctttatccagcttaactaagctgtactaataaggaagaaagcacattattggaatcagcgtcaatattga  
cgacaatttaatttctcaaaaccttaccaacaaatccattctttctacaaattgtcctaaacctgcagacgctaatttattatcgcaattaccaacaacac  
tccaatgtgttaaatcggtcccaaacggcatgggcacttgggttttaataacctgagctctcgaacgaatttaattattcaagcaaaactgatcctgcgtt  
tacaacagactggaaagactcttacattaatagttggacaggaccagcaccaacaaaatgggtcgctagtgggtcttacttggaaacagcaccaact  
ggagaaaaatgtataattcttcaagcaacaaaagtggggaataccttagaatgcggaatggttacatctaaagctaaagcaacattcccatcttacca  
agaggccagagtaagaataagtgattctcacttagccaatgccgtgtggatgttaagtactgattctagagaagaaattgacaaccttgaatcttatg  
gagataaattaggggtcaaaacatatgttgagataaattacatttaagccatcatacttttaagatattgcaggtgttagaaaagattatcaaccca  
attggagacctggatgataagaaaaacagggcggggttgaatgctactgatgatgtaaaatggaataccgcttccatatttttggggtaaaatgg  
gttaatgtactaatctagaatattatgtagatggagtaaaagtaagaaccgtaacaggcaccgatattgaccgaaacggctacacagattgttcagg  
aatgaaaaaagctttgcataatgattattagtaagcagcacaacatggcgatttgcgtgacatgaatgagttttcaaccagaacattaccaatggcgc  
aagaactaagatgtacatagactggattcgtgtttacagaccaaatacaaattaggcaccttacttgaattaa
